# Supplementary material for: Constitutive deletion of the obscurin-Ig58/59 domains induces atrial remodeling and Ca2+-based arrhythmogenesis
Source: JCI journal article supplement (doi:10.1172/jci.insight.184202), 2025-01-07
Supplement: sd2 [file 2]

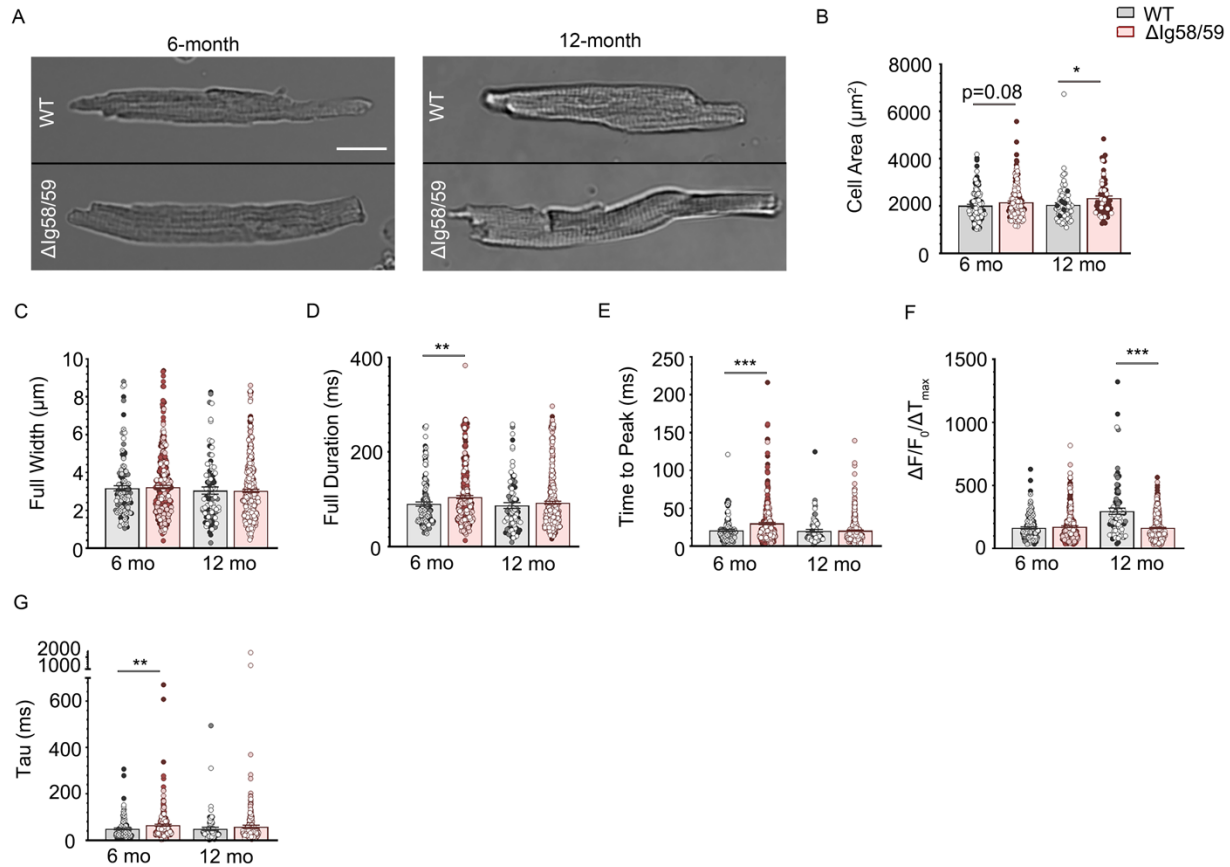

959

960 **SFigure 1. Evaluation of Ca<sup>2+</sup> spark morphology and Ca<sup>2+</sup> in *Obscn-ΔIg58/59* atria at 6- and**

961 **12- months. (A-B)** Cardiomyocytes isolated from *Obscn-ΔIg58/59* atria were significantly

962 enlarged at 12-months of age compared to age-matched wild-type; scale bar: 20  $\mu m$ ; t-test,

963 \* $p < 0.05$ ;  $n = 2$  animals per group, 60-101 cells per heart (6-months), 7-83 cells per heart (12-

964 months); data points represent individual cells and are color-coded by biological replicate. **(C-G)**

965 Analysis of Ca<sup>2+</sup> spark morphology revealed no significant differences in full width (C), and age-

966 specific alterations in full duration (D), time to peak (E), the maximum steepness of spark upstroke

967 calculated as  $\Delta F/F_0/\Delta T_{max}$  (F), and the exponential time constant of decay, Tau (G) in *Obscn-*

968 *ΔIg58/59* atria at 6- and 12- months; t-test, \*\* $p < 0.01$  \*\*\* $p < 0.001$ ,  $n = 5$  animals per group (6-

969 months),  $n = 3$  animals per group (12-months); 9-20 cells per heart (6-months), 7-17 cells per heart

970 (12-months); data points represent individual sparks and are color-coded by biological replicate.

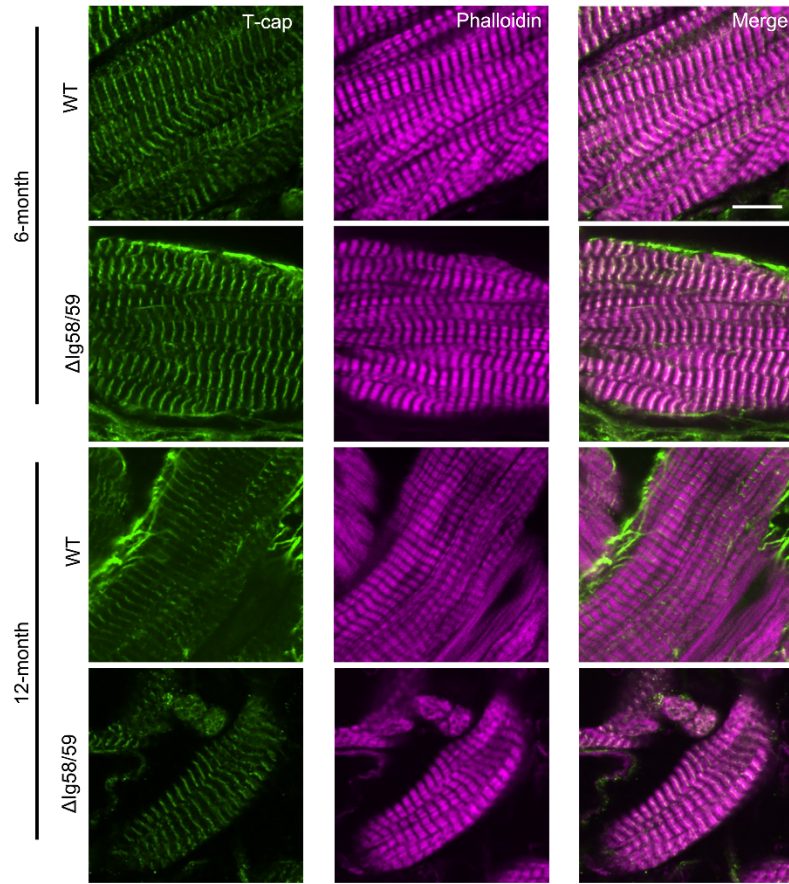

971

972 **SFigure 2. The localization of T-cap is unchanged in *Obscn-ΔIg58/59* atria.** Immunostained  
 973 cryosections of wild-type and *Obscn-ΔIg58/59* atrial tissues indicated that T-cap is properly  
 974 localized to the Z-disk at both 6- and 12-months as determined by co-staining with the actin  
 975 marker, phalloidin; scale bar: 10 μm.

976

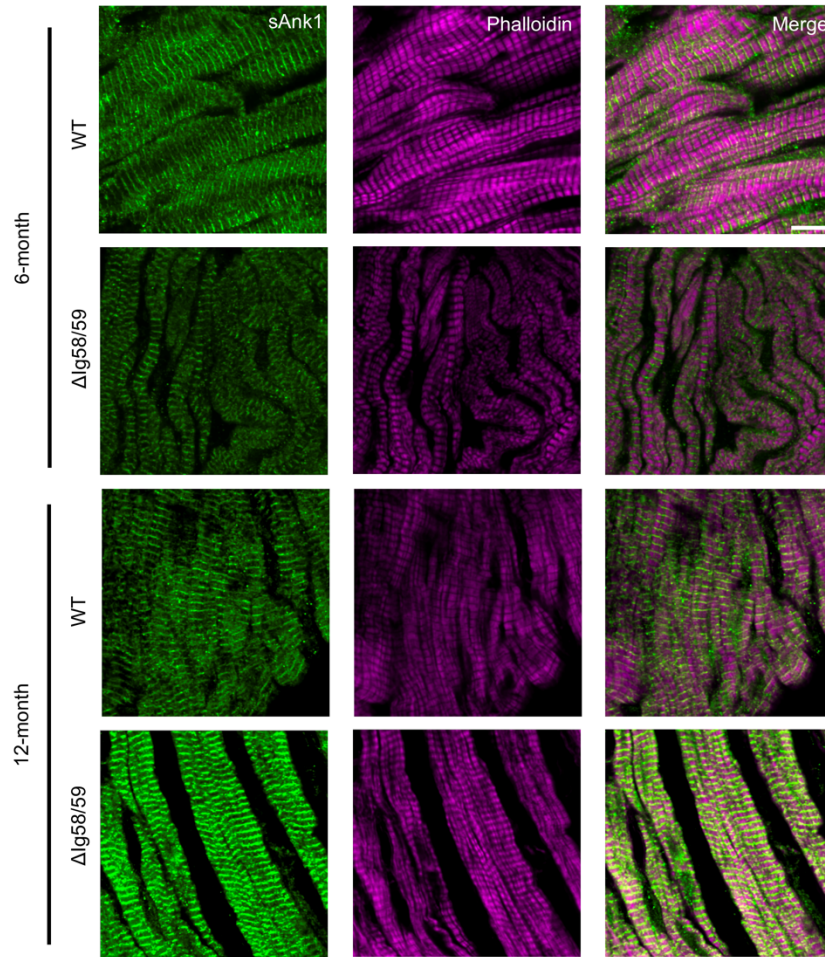

977

978 **SFigure 3. The localization of sAnk1 is unchanged in *Obscn-ΔIg58/59* atria.** Immunostained  
 979 cryosections of wild-type and *Obscn-ΔIg5859* atrial tissues do not indicate alterations in sAnk1  
 980 localization at 6- or 12-months as determined by co-staining with the actin marker, phalloidin,  
 981 suggesting the structure of the SR is unaffected in *Obscn-ΔIg5859* atria; scale bar: 10 μm.

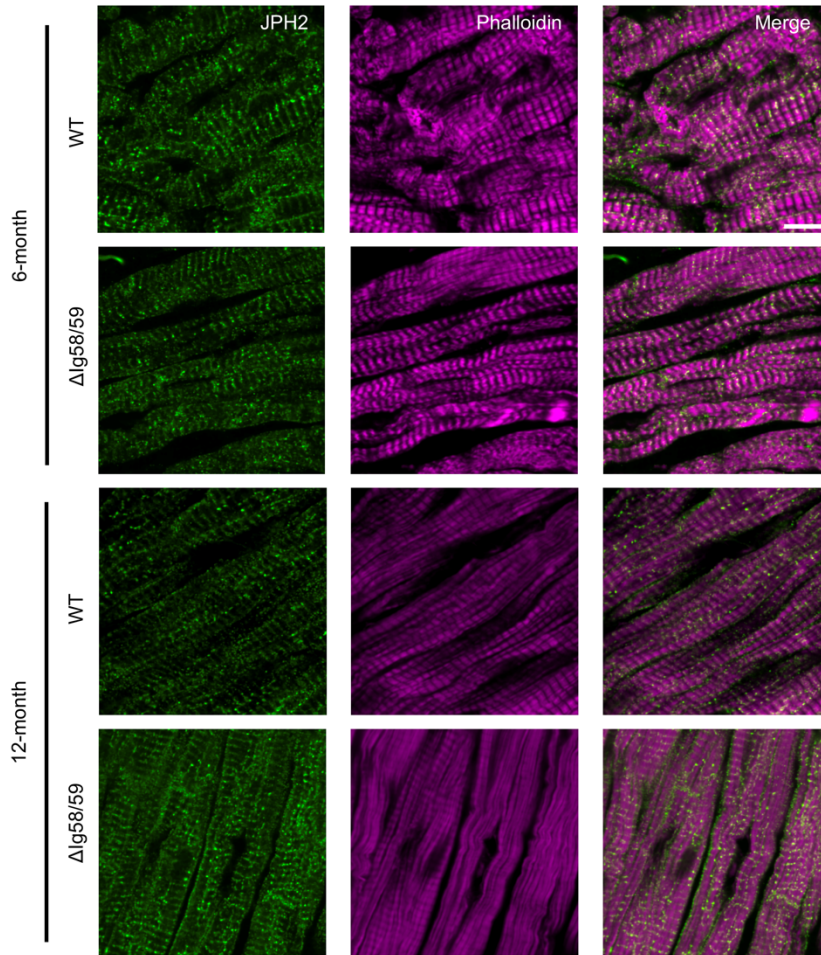

983

984 **SFigure 4. The localization of JPH2 is unchanged in *Obscn-ΔIg58/59* atria.** Immunostained  
 985 cryosections of wild-type and *Obscn-ΔIg58/59* atrial tissues do not indicate alterations in JPH2  
 986 localization at 6- or 12-months as determined by co-staining with the actin marker, phalloidin,  
 987 suggesting that the junctional SR is unaffected in *Obscn-ΔIg58/59* atria; scale bar: 10 μm.

988
